# Supplementary material
Source: publisher figshare collection journal article supplement (https://frontiersin.figshare.com/ndownloader/files/21808707)
Supplement: Supplementary file [file 21808707]

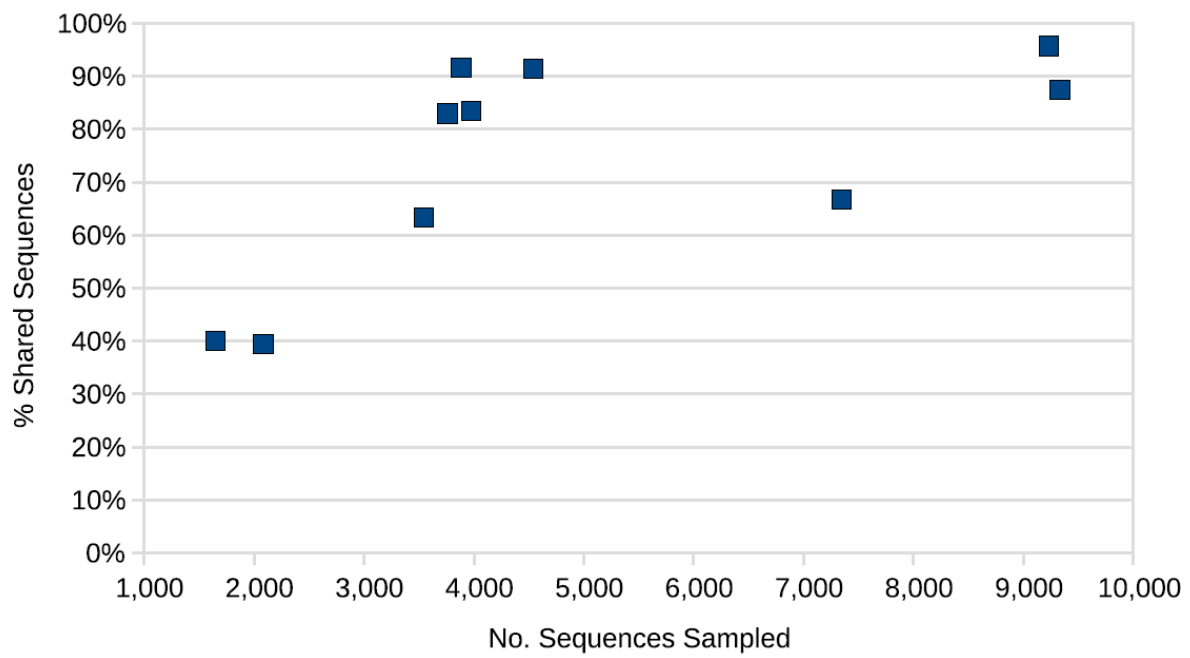

**Supplemental Figure 1.** The number of shared sequences among all springs relative to the number of random sequences sampled in the total data set.
